# Supplementary material
Source: publisher figshare collection journal article supplement (https://gsajournals.figshare.com/ndownloader/files/26881232)
Supplement: Supplementary file 1 [file 26881232]

## Sheet: Table_S3
Table S2: Input datasets
Dataset category	Cell type	Library ID	Treatment	Fixative	Platform	Assembly	GEO	Mapped reads	Percent GC	Duplication rate	Percent mapped	Used for Library IDs	Comment
input	G1E-ER4+E2	2	10 mM estradiaol 24 hr	Thermo Fisher BP531	HiSeq2000	mm10	GSE159503	2332737	43	15	97	335, 366, 369, 485, 505, 580-585, 692-696, 670-674, 702-707, 732-736, 785-789	The fastqs from library IDs 2, 137, 151, and 240 were concatenated to generate a combined input file for MACS2.
input	G1E-ER4+E2	137	10 mM estradiaol 24 hr	Thermo Fisher BP531	HiSeq2000	mm10	GSE159503	101172193	42	12	91	335, 366, 369, 485, 505, 580-585, 692-696, 670-674, 702-707, 732-736, 785-789	The fastqs from library IDs 2, 137, 151, and 240 were concatenated to generate a combined input file for MACS2.
input	G1E-ER4+E2	151	10 mM estradiaol 24 hr	Thermo Fisher BP531	HiSeq2000	mm10	GSE159503	31256734	43	10	96	335, 366, 369, 485, 505, 580-585, 692-696, 670-674, 702-707, 732-736, 785-789	The fastqs from library IDs 2, 137, 151, and 240 were concatenated to generate a combined input file for MACS2.
input	G1E-ER4+E2	240	10 mM estradiaol 24 hr	Thermo Fisher BP531	HiSeq2000	mm10	GSE159503	35483560	44	11	94	335, 366, 369, 485, 505, 580-585, 692-696, 670-674, 702-707, 732-736, 785-789	The fastqs from library IDs 2, 137, 151, and 240 were concatenated to generate a combined input file for MACS2.
input	G1E-ER4+E2	574	10 mM estradiaol 24 hr	Thermo Scientific 28908	HiSeq2000	mm10	GSE159503	42023877	40	19	95	582
input	G1E-ER4+E2	575	10 mM estradiaol 24 hr	Thermo Scientific 28908	HiSeq2000	mm10	GSE159503	42228025	40	18	95	583
input	G1E-ER4+E2	572	10 mM estradiaol 24 hr	Sigma F8775	HiSeq2000	mm10	GSE159503	52471357	40	18	95	584
input	G1E-ER4+E2	573	10 mM estradiaol 24 hr	Sigma F8775	HiSeq2000	mm10	GSE159503	47580707	39	18	95	585
input	G1E-ER4+E2 (YFP-MD)	525	100 mM estradiaol 13 hr, 1 hr release from noco	unknown	HiSeq2000	mm9	GSE83293, GSM2197815, GSE159503	36330900	39	20	94	518
input	G1E-ER4+E2 (YFP-MD)	526	100 mM estradiaol 13 hr, 1.5 hr release from noco	unknown	HiSeq2000	mm9	GSE83293, GSM2197816, GSE159503	42524062	39	21	94	519
input	G1E-ER4+E2 (YFP-MD)	527	100 mM estradiaol 13 hr, 3 hr release from noco	unknown	HiSeq2000	mm9	GSE83293, GSM2197817, GSE159503	36755535	39	18	94	520
input	G1E-ER4+E2 (YFP-MD)	528	100 mM estradiaol 13 hr, 6 hr release from noco	unknown	HiSeq2000	mm9	GSE83293, GSM2197818, GSE159503	51383832	40	19	94	521
input	G1E-ER4+E2 (YFP-MD)	632	100 mM estradiaol 13 hr, 1 hr release from noco	unknown	HiSeq2000	mm9	GSE83293, GSM2197820, GSE159503	39204442	40	19	95	640
input	G1E-ER4+E2 (YFP-MD)	633	100 mM estradiaol 13 hr, 1.5 hr release from noco	unknown	HiSeq2000	mm9	GSE83293, GSM2197821, GSE159503	42067413	40	19	95	641
input	G1E-ER4+E2 (YFP-MD)	634	100 mM estradiaol 13 hr, 3 hr release from noco	unknown	HiSeq2000	mm9	GSE83293, GSM2197822, GSE159503	43916860	40	21	95	642
input	G1E-ER4+E2 (YFP-MD)	635	100 mM estradiaol 13 hr, 4 hr release from noco	unknown	HiSeq2000	mm9	GSE83293, GSM2197823, GSE159503	41372695	40	18	95	643
input	G1E-ER4+E2 (YFP-MD)	636	100 mM estradiaol 13 hr, 6 hr release from noco	unknown	HiSeq2000	mm9	GSE83293, GSM2197824, GSE159503	46006926	40	20	95	644
input	G1E-ER4+E2 (YFP-MD)	637	100 mM estradiaol 13 hr, asynchronous	unknown	HiSeq2000	mm9	GSE83293, GSM2197825, GSE159503	38825073	39	21	95	645
input	G1E-ER4 (YFP-MD)	638	none	unknown	HiSeq2000	mm9	GSE83293, GSM2197850, GSE159503	45929150	39	22	95	646
input	G1E-ER4+E2 (YFP-MD)	719	100 mM estradiaol 13 hr, 1 hr release from noco	unknown	HiSeq2000	mm9	GSE83293, GSM2197836, GSE159503	49970726	40	23	95	710, 770
input	G1E-ER4+E2 (YFP-MD)	720	100 mM estradiaol 13 hr, 1.5 hr release from noco	unknown	HiSeq2000	mm9	GSE83293, GSM2197837, GSE159503	43153708	41	18	95	711, 771
input	G1E-ER4+E2 (YFP-MD)	721	100 mM estradiaol 13 hr, 3 hr release from noco	unknown	HiSeq2000	mm9	GSE83293, GSM2197838, GSE159503	51675142	41	21	95	712, 772
input	G1E-ER4+E2 (YFP-MD)	722	100 mM estradiaol 13 hr, 4 hr release from noco	unknown	HiSeq2000	mm9	GSE83293, GSM2197839, GSE159503	59449962	41	20	95	713, 773
input	G1E-ER4+E2 (YFP-MD)	723	100 mM estradiaol 13 hr, 6 hr release from noco	unknown	HiSeq2000	mm9	GSE83293, GSM2197840, GSE159503	48545031	41	19	95	714, 774
input	G1E-ER4+E2 (YFP-MD)	724	100 mM estradiaol 13 hr, asynchronous	unknown	HiSeq2000	mm9	GSE83293, GSM2197841, GSE159503	52961388	40	20	95	715, 775
input	G1E-ER4 (YFP-MD)	725	none	unknown	HiSeq2000	mm9	GSE83293, GSM2197852, GSE159503	52618417	40	18	95	716, 776
input	LSK	1296	none	Thermo Scientific 28906	NextSeq 500	mm10	GSE159503, GSM4831259	73075976	41	19	97	1295, 1927
input	CMP	1982	none	Thermo Scientific 28906	NextSeq 500	mm10	GSE159503, GSM4831260	36229062	41	18	97	1976
input	MEP	1984	none	Thermo Scientific 28906	NextSeq 500	mm10	GSE159503, GSM4831261	28152941	41	18	96	1978
input	CFUE	1986	none	Thermo Scientific 28906	NextSeq 500	mm10	GSE159503, GSM4831262	33999495	41	17	97	1980
input	ERY	1928	none	Thermo Scientific 28906	NextSeq 500	mm10	GSE159503, GSM4831263	57492960	41	18	97	1909, 1926
input	GMP	1983	none	Thermo Scientific 28906	NextSeq 500	mm10	GSE159503, GSM4831264	35253998	41	15	97	1977
input	CFUMk	1985	none	Thermo Scientific 28906	NextSeq 500	mm10	GSE159503, GSM4831265	28933018	41	17	97	1979
input	iMk	1929	none	Thermo Scientific 28906	NextSeq 500	mm10	GSE159503, GSM4831266	43311316	42	20	95	1908, 1910
